# Supplementary material for: Synthesis and functional studies of THF–gramicidin hybrid ion channels
Source: Royal Society of Chemistry journal article supplement (doi:10.1039/b303249n), 2003-01-01
Supplement: b303249n4.pdf [file b303249n4.pdf]

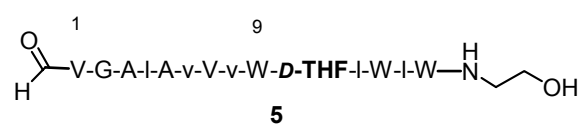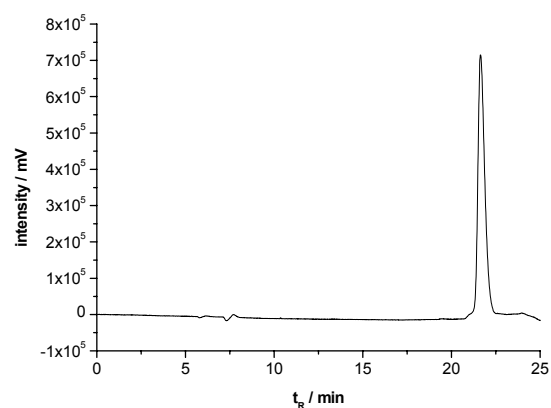

HPLC: 23.9 min (250 x 4 mm Jupiter C 5, 65% → 75%  
B in 25 min, A: H<sub>2</sub>O; B: acetonitrile/isopropanol 2:1;  
0.7 ml/min)

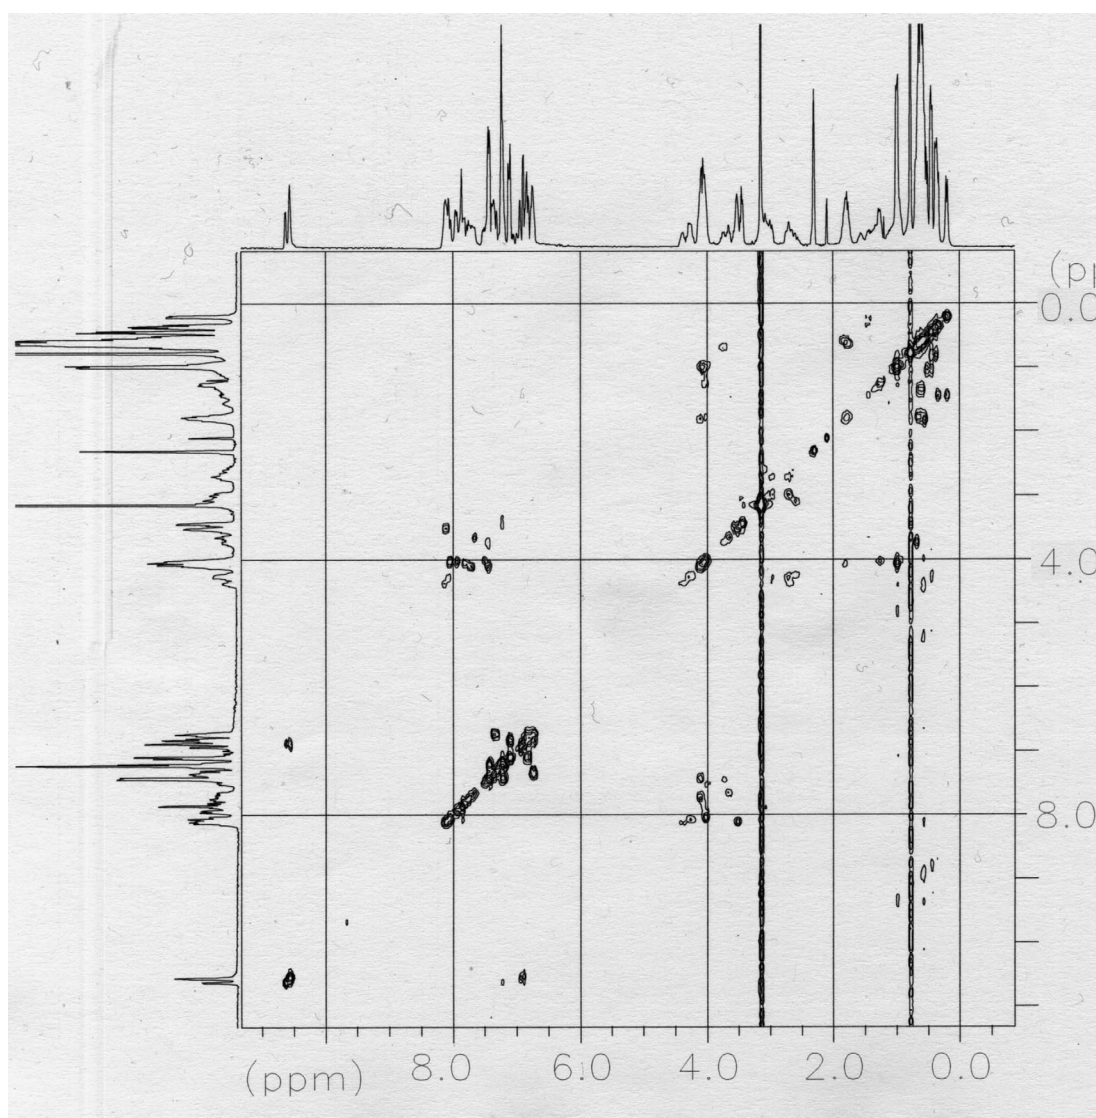

H,H-COSY; 500 MHz, DMSO- $\delta_6$
