# Supplementary material for: Synthesis and functional studies of THF–gramicidin hybrid ion channels
Source: Royal Society of Chemistry journal article supplement (doi:10.1039/b303249n), 2003-01-01
Supplement: b303249n7.pdf [file b303249n7.pdf]

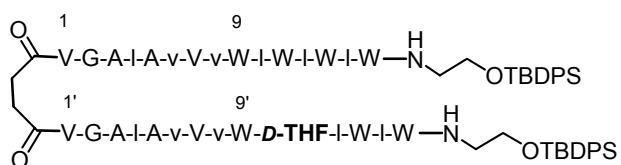

8

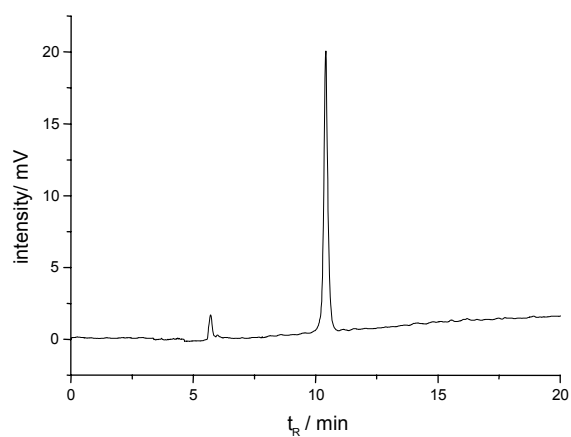

HPLC: 10.6 min (10 x 250 mm Rainin C 4, 80% → 90% B in 10 min, then 90% → 100% B in 15 min. A: H<sub>2</sub>O + 0.1% TFA; B: acetonitrile/isopropanol 2:1 + 0.1% TFA; 3.3 ml/min)

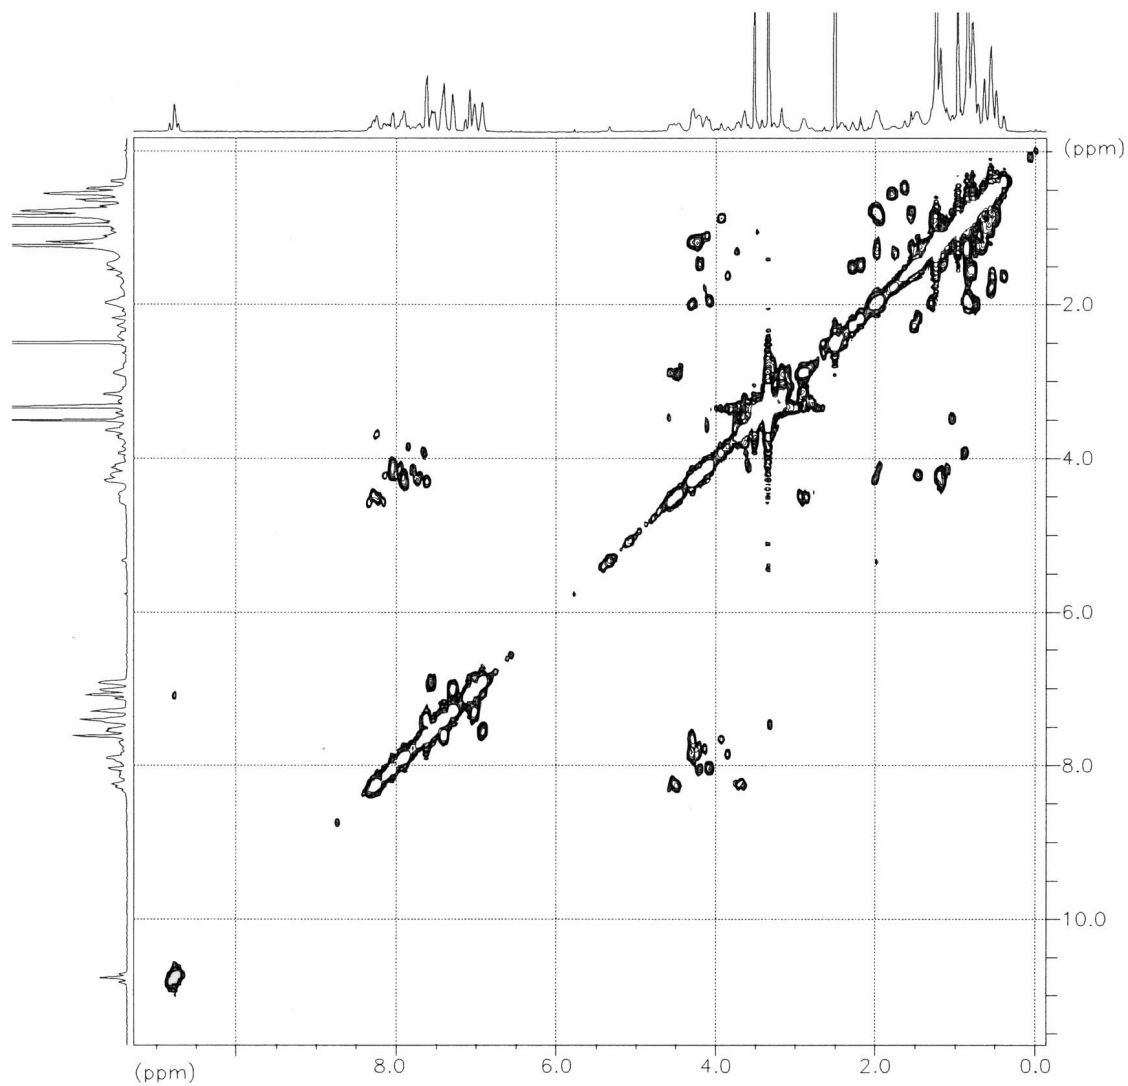

H,H-COSY; 500 MHz, DMSO- $\delta_6$
