# Supplementary material for: Synthesis and functional studies of THF–gramicidin hybrid ion channels
Source: Royal Society of Chemistry journal article supplement (doi:10.1039/b303249n), 2003-01-01
Supplement: b303249n8.pdf [file b303249n8.pdf]

|           | Conductance/pS |      |      |      | c<br>(mol/l) |
|-----------|----------------|------|------|------|--------------|
|           | CsCl           | RbCl | KCl  | NaCl |              |
| <b>5</b>  | 3.16           | 0.89 | 0.66 | —    | $10^{-8}$    |
| <b>6</b>  | 3.19           | 2.09 | 1.56 | 0.34 | $10^{-8}$    |
| <b>7</b>  | 6.96           | 2.73 | 1.80 | 0.65 | $10^{-13}$   |
| <b>gA</b> | 43.6           | 43.1 | 26.0 | 14.8 | $10^{-10}$   |

**Table S1** Single channel currents of compounds **5**, **6**, **7** and **gA** for different cations.
