# Supplementary figures and images for: Synthesis and functional studies of THF–gramicidin hybrid ion channels
Source: Royal Society of Chemistry journal article supplement (doi:10.1039/b303249n), 2003-01-01

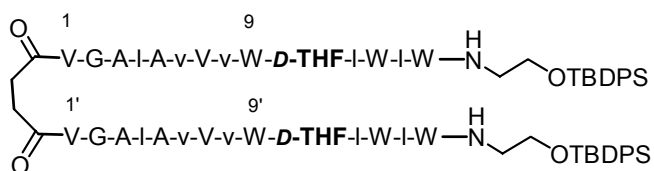

7

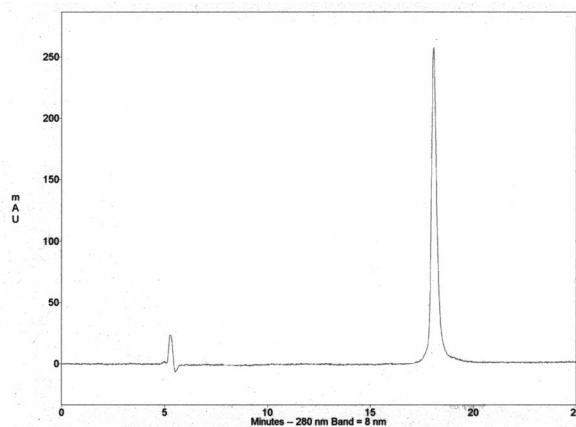

HPLC: 18.1 min (M4, Experimental Section)

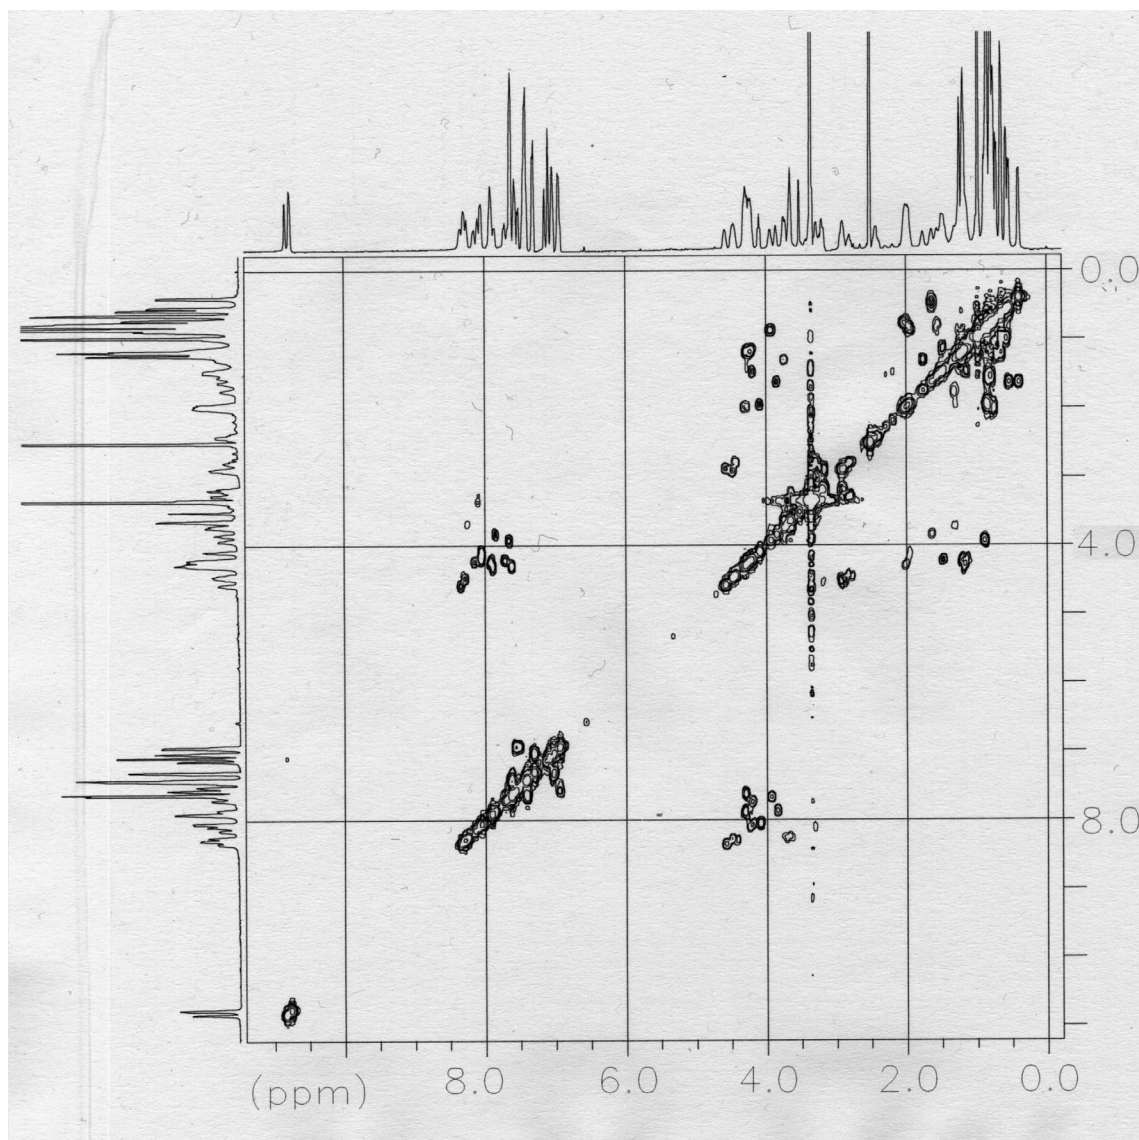

Supplement: b303249n6.pdf [file b303249n6.pdf]
